# Supplementary material for: New approaches to high-resolution mapping of marine vertical structures
Source: PubMed Central journal article supplement (PMC5567197; doi:10.1038/s41598-017-09382-z), 2017-08-21
Supplement: 41598_2017_9382_MOESM1_ESM.pdf [file 41598_2017_9382_MOESM1_ESM.pdf]

## **New approaches to high-resolution mapping of marine vertical structures**

Katleen Robert, Veerle A. I. Huvenne, Aggeliki Georgiopoulou, Daniel O. B. Jones, Leigh Marsh, Gareth D.O. Carter, and Leo Chaumillon

### **SUPPLEMENTARY INFORMATION**

**Supplementary Information S1:** Fly through video showing the difference in resolution achievable with a sideways-looking AUV multibeam echosounder (MBES) (right) as compared to the ship-board MBES (left). Results for the Whittard Canyon Acesa Wall (depth range: 500-900m) are shown on top while the bottom shows the Whittard Canyon Coral Wall (depth range: 1,100-1,600m).

**Supplementary Information S2:** 3D model of the bathymetry obtained using a sideways-looking AUV multibeam echosounder for the Whittard Canyon Coral Wall (resolution: 5m).

**Supplementary Information S3:** 3D model of the bathymetry obtained using a sideways-looking AUV multibeam echosounder for the Whittard Canyon Acesa Wall (resolution: 0.5m)

**Supplementary Information S4:** Detailed description of the photogrammetry approach

**Supplementary Information S5:** Video animation showing a video frame slowly fading to reveal the results of the 3D photogrammetry reconstruction for a small section (~6m in length) of the Rockall Escarpment.

**Supplementary Information S6:** 3D model of the photogrammetry reconstruction for a small section (~6m in length) of the Rockall Escarpment.

*Please note, not all pdf viewing software can display 3D models and the option to trust 3D content must be enabled in Adobe Reader.*
